# Supplementary material for: Probiotic supplementation and risk of necrotizing enterocolitis and mortality among extremely preterm infants—the Probiotics in Extreme Prematurity in Scandinavia (PEPS) trial: study protocol for a multicenter, double-blinded, placebo-controlled, and registry-based randomized controlled trial
Source: Springer Nature journal article supplement (doi:10.1186/s13063-024-08088-8), 2024-04-12
Supplement: MOESM1 [file 26972340]

# Case Report Form (CRF)

Record ID

\_\_\_\_\_

Study ID

\_\_\_\_\_

Date of randomization

\_\_\_\_\_  
(YY-MM-DD )

Group assignment

- A  
 B  
(A or B)

Start date of intervention

\_\_\_\_\_

Intervention interrupted  
Note if intervention has been interrupted during study  
intervention period.

\_\_\_\_\_

Add description for interrupting intervention.

If numerous interruptions: add 1, 2, 3 and so on  
before every interruption period

Infection during pregnancy

- Yes  
 No

Antenatal antibiotics

- Yes  
 No  
(Note Yes if mother has been given antibiotics  
during pregnancy )

Stool sample at baseline

- Yes  
 No  
(As soon as possible after inclusion/randomization  
)

Stool sample at 14 (+/- 2 days)

- Yes  
 No

Stool sample at 34 weeks gestational age (+/- 2 days)

- Yes  
 No

Stool sample at 12 months corrected age

- Yes  
 No

Comments

Add potential comments to data entry in CRF

\_\_\_\_\_

# Case Report Form (CRF) - sub cohort

---

Study ID

\_\_\_\_\_

---

Bolus feeds

- Yes  
 No

---

Period of treatment with bolus feeds  
Document as YY-MM-DD - YY-MM-DD.  
Or document if the patients has always been given  
bolus feeds.

\_\_\_\_\_

---

Continious feeds

- Yes  
 No

---

Period of treatment with continious feeds  
Document as YY-MM-DD - YY-MM-DD.  
Or document if the patients has always been given  
continious feeds.

\_\_\_\_\_

---

Interruptions of enteral feeds for >8 hours

\_\_\_\_\_

# Verification of NEC

---

Study ID

\_\_\_\_\_

---

Episode 1  
Abdominal symphoms

\_\_\_\_\_  
(Description )

INCLUDE DATE OF EVENT

---

Episode 1  
Radiological findings

\_\_\_\_\_  
(Description)

INCLUDE DATE OF EVENT

---

Episode 1  
Differential diagnoses

\_\_\_\_\_  
(SIP, malrotation, volvulus, other?)

---

Episode 1  
Operation with NEC findings

Yes  
 No

---

Episode 1  
Verified NEC

Yes  
 No

---

Episode 2  
Abdominal symphoms

\_\_\_\_\_

INCLUDE DATE OF EVENT

---

Episode 2  
Radiological findings

\_\_\_\_\_

INCLUDE DATE OF EVENT

---

Episode 2  
Differential diagnoses

\_\_\_\_\_

---

Episode 2  
Operation with NEC findings

Yes  
 No

---

Episode 2  
Verified NEC

Yes  
 No

---

Episode 3  
Abdominal symphoms

---

INCLUDE DATE OF EVENT

---

Episode 3  
Radiological findings

---

INCLUDE DATE OF EVENT

---

Episode 3  
Differential diagnoses

---

---

Episode 3  
Operation with NEC findings

Yes  
 No

---

Episode 3  
Verified NEC

Yes  
 No

---

Episode 4  
Abdominal symphoms

---

INCLUDE DATE OF EVENT

---

Episode 4  
Radiological findings

---

INCLUDE DATE OF EVENT

---

Episode 4  
Differential diagnoses

---

---

Episode 4  
Operation with NEC findings

Yes  
 No

---

Episode 4  
Verified NEC

Yes  
 No

---

Episode 5  
Abdominal symphoms

---

INCLUDE DATE OF EVENT

---

Episode 5  
Radiological findings

---

INCLUDE DATE OF EVENT

---

Episode 5  
Differential diagnoses

---

---

Episode 5  
Operation with NEC findings

Yes  
 No

---

Episode 5  
Verified NEC

Yes  
 No

---

Comments

Use for comments or for documenting more potential NEC episodes

---

INCLUDE DATE OF EVENT

# Verification of Sepsis

---

Study ID

---

---

Sepsis episode 1  
LPK < 5 or > 20 (x109 cells/L)  Yes  
 No

---

Sepsis episode 1  
TPK < 100 (x109 cells/L)  Yes  
 No

---

Sepsis episode 1  
CRP > 15 mg/L  Yes  
 No

---

Verified sepsis  
Incidence of sepsis is defined as culture proven sepsis including positive blood, urin - and/or urin, clinical impairment and laboratory inflammatory response were at least one of the three above is confirmed  Yes  
 No

---

Sepsis episode 2  
LPK < 5 or > 20 (x109 cells/L)  Yes  
 No

---

Sepsis episode 2  
TPK < 100 (x109 cells/L)  Yes  
 No

---

Sepsis episode 2  
CRP > 15 mg/L  Yes  
 No

---

Sepsis episode 2  Yes  
 No

---

Verified sepsis  
Incidence of sepsis is defined as culture proven sepsis including positive blood, urin - and/or urin, clinical impairment and laboratory inflammatory response were at least one of the three above is confirmed

---

Sepsis episode 3  
LPK < 5 or > 20 (x109 cells/L)  Yes  
 No

---

Sepsis episode 3  
TPK < 100 (x109 cells/L)  Yes  
 No

---

Sepsis episode 3  
CRP > 15 mg/L  Yes  
 No

---

---

Sepsis episode 3

- Yes
- No

Verified sepsis

Incidence of sepsis is defined as culture proven sepsis including positive blood, urin - and/or urin, clinical impairment and laboratory inflammatory response were at least one of the three above is confirmed

---

Sepsis episode 4  
LPK < 5 or > 20 (x10<sup>9</sup> cells/L)

- Yes
  - No
- 

Sepsis episode 4  
TPK < 100 (x10<sup>9</sup> cells/L)

- Yes
  - No
- 

Sepsis episode 4  
CRP > 15 mg/L

- Yes
  - No
- 

Sepsis episode 4

- Yes
- No

Verified sepsis

Incidence of sepsis is defined as culture proven sepsis including positive blood, urin - and/or urin, clinical impairment and laboratory inflammatory response were at least one of the three above is confirmed

# Reporting Serious Adverse Events (SAE)

---

Study ID

---

Death

- Yes  
 No
- 

Verified NEC

- Yes  
 No
- 

Verified sepsis

- Yes  
 No
- 

RDS

- Yes  
 No
- 

BPD

- Yes  
 No
- 

PDA

- Yes  
 No
- 

PPHN

- Yes  
 No
- 

IVH

- Yes  
 No
-



---

Hydrocephalus  Yes  
 No

---

\_\_\_\_\_

---

ROP  Yes  
 No

---

\_\_\_\_\_

---

Gastrointestinal diagnoses (volvulus, ileus, SIP, malrotation, other)

\_\_\_\_\_ (description)

---

\_\_\_\_\_

---

Comments

\_\_\_\_\_

# Reporting Suspected unexpected serious adverse event (SUSAR)

---

Study ID

---

---

Patients name

---

(First and second name)

---

Patients Social Security Number

---

(Personnummer/reservnummer)

---

Date of event (SUSAR)

---

---

Time of event (if applicable)

---

---

Place of event

---

---

Description of event

DO NOT ADD INFORMATION ABOUT GROUP ALLOCATION EVEN IF  
CODE BREAKING HAS ACCOURED

---

# Screening Log

---

Date of screening

\_\_\_\_\_

---

Gestational age

\_\_\_\_\_  
(Week + day (For example 26+3))

---

Meets inclusion criteria

Yes  
 No

---

If previous answers was "No". Please add description why inclusion criterias were not meet.

\_\_\_\_\_

---

Included in PEPS-trial

Yes  
 No

---

If previous answers was "No" even though inclusion criteria were met. Add description why the patient was not included.  
For example: parents did not give consent

\_\_\_\_\_

---

STUDY ID  
If included (N-NNN)

\_\_\_\_\_

---

Other information

\_\_\_\_\_  
(if appliable )

# Patient Identification Log

---

STUDY ID

---

(Add study id (N-NNN) )

---

Full Name

---

(First name and last name )

---

Social Security Number

---

("personnummer eller reservnummer" )

---

Date of randomization

---

(YY-MM-DD)

---

Group allocation

- A
- B

---

Including hospital

- Karolinska UH Solna
- Karolinska UH Huddinge
- Linköping UH
- Lund UH
- Sahlgrenska UH
- Umeå UH
- Uppsala UH
- Aarhus UH
- Copenhagen UH
- Glostrup UH
- Odense UH
- Aalborg
